# Supplementary material
Source: PubMed Central journal article supplement (PMC7175454)

## Electronic Supplementary Information

Nguyen et al. “Isolated *Saccharomyces Cerevisiae* Vacuoles contain Low-Molecular-Mass Transition-Metal Polyphosphate Complexes”

### Table of Contents

- Table S1: Batches of *S. cerevisiae* vacuoles isolation used in this study.
- Figure S1: Calibration Curve of Size-Exclusion Column.
- Figure S2: Iron-detected Chromatograms of Vacuolar FTSs.
- Figure S3: Phosphorous-detected chromatograms of FTS from isolated vacuoles.
- Figure S4: Zinc-detected chromatograms of FTSs from isolated vacuoles.
- Figure S5: Manganese-detected chromatograms of FTSs from isolated vacuoles.
- Figure S6: Overlaying of Mn and P for Batch 13, 16, 17, and 18 at pH 8.5 mobile phase.
- Figure S7: Phosphorous-detected Chromatograms of FTS from isolated vacuoles from WT strain in the presence of Phosphatase Inhibitors.
- Figure S8: Copper-detected Chromatograms of FTS from isolated vacuoles from WT strain.
- Figure S9: Copper-detected Chromatograms of FTS from isolated vacuoles from Cox17 $\Delta$  and Cup1 $\Delta$  cells.

**Table S1:** Batches of *S. cerevisiae* vacuoles isolation used in this study. “Sta” and “Exp” refer to stationary phase and exponential phase, respectively. Final supplemented metal concentrations are given in  $\mu\text{M}$ . Default supplemented Fe, Cu, Zn, and Mn concentrations were 40, 10, 0, and 0  $\mu\text{M}$ , respectively.

| Batch | Strain                | Medium | Harvest | Non-default [M]      |
|-------|-----------------------|--------|---------|----------------------|
| 01    | WT                    | MM     | Sta     |                      |
| 02    | WT                    | MM     | Sta     |                      |
| 03    | WT                    | MM     | Sta     |                      |
| 04    | WT                    | MM     | Sta     |                      |
| 05    | WT                    | MM     | Exp     |                      |
| 06    | WT                    | MM     | Exp     |                      |
| 07    | WT                    | MM     | Exp     |                      |
| 08    | WT                    | MM     | Exp     |                      |
| 09    | WT                    | MM     | Exp     |                      |
| 10    | WT                    | CSM    | Sta     | 40 Cu; 200 Zn; 40 Mn |
| 11    | WT                    | CSM    | Sta     | 40 Cu; 200 Zn; 40 Mn |
| 12    | WT                    | CSM    | Sta     | 20 Cu; 100 Zn; 20 Mn |
| 13    | WT                    | CSM    | Sta     |                      |
| 14    | WT                    | CSM    | Sta     |                      |
| 15    | WT                    | CSM    | Sta     |                      |
| 16    | WT                    | CSM    | Sta     |                      |
| 17    | WT                    | CSM    | Sta     |                      |
| 18    | WT                    | CSM    | Sta     |                      |
| 19    | WT                    | CSM    | Sta     | 1 Fe                 |
| 20    | WT                    | CSM    | Sta     | 1 Fe                 |
| 21    | WT                    | CSM    | Sta     | 20 Cu; 100 Zn; 20 Mn |
| 22    | <i>cox17</i> $\Delta$ | CSM    | Sta     | 20 Cu; 100 Zn; 20 Mn |
| 23    | <i>cox17</i> $\Delta$ | CSM    | Sta     | 20 Cu; 100 Zn; 20 Mn |
| 24    | <i>cup1</i> $\Delta$  | CSM    | Sta     |                      |
| 25    | <i>cup1</i> $\Delta$  | CSM    | Sta     |                      |
| 26    | <i>cup1</i> $\Delta$  | CSM    | Sta     |                      |
| 27    | <i>cup1</i> $\Delta$  | CSM    | Sta     |                      |
| 28    | WT                    | CSM    | Sta     |                      |
| 29    | WT                    | CSM    | Sta     |                      |

**Figure S1: Calibration Curve of Size Exclusion Column.** Best-fit line was  $\text{Log}(\text{Molecular Mass, Da}) = -1.0529 \times (V_e/V_o) + 5.4287$  where  $V_e$  and  $V_o$  are elution volume and void volume, respectively. The void volume was determined to be 14.94 mL using Blue Dextran (Fisher Scientific). The correlation coefficient  $R^2$  was 0.9607. The molecular masses of standards used for calibration curve were from a previous study (66): cytochrome c *Saccharomyces cerevisiae* (12,384 Da), insulin (5,777 Da), cyanocobalamin (1,355 Da), ADP (427 Da), and AMP (327 Da).

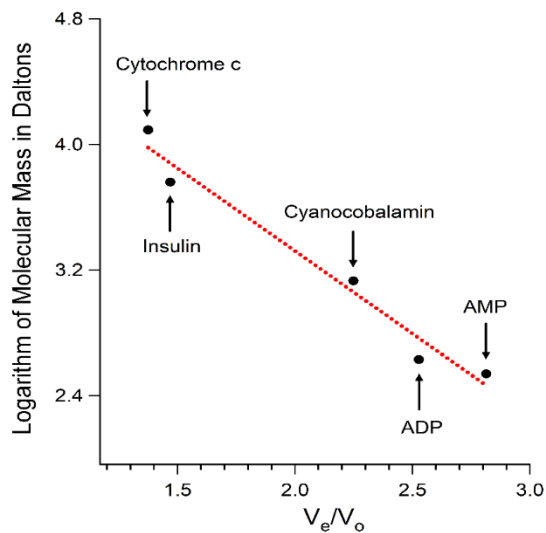

**Figure S2: Iron-detected Chromatograms of Vacuolar FTSs.**

A, Vacuolar FTSs from cells grown in minimal media containing 40  $\mu\text{M}$   $\text{Fe}^{\text{III}}$  citrate and harvested during stationary (B1 – B4) and exponential (B5 – B9) phases. The mobile phase pH was 8.5. Some trace intensities were multiplied by the indicated factor. Numbers above vertical dashed lines indicate approximate mass in Da for species at that elution volume. B, Vacuole FTSs from cells grown in synthetic complete medium supplemented with 40  $\mu\text{M}$   $\text{Fe}^{\text{III}}$  citrate and harvested in stationary phase (B10 – B20). Vacuolar FTS of B19 and B20 were prepared in the same way but the media was supplemented with 1  $\mu\text{M}$   $\text{Fe}^{\text{III}}$  citrate. The mobile phase pH was 8.5. C, Vacuole FTSs prepared as in B with 40 (B10 – B18) or 1 (B19 – B20)  $\mu\text{M}$   $\text{Fe}^{\text{III}}$  citrate. The mobile phase pH was 6.5.

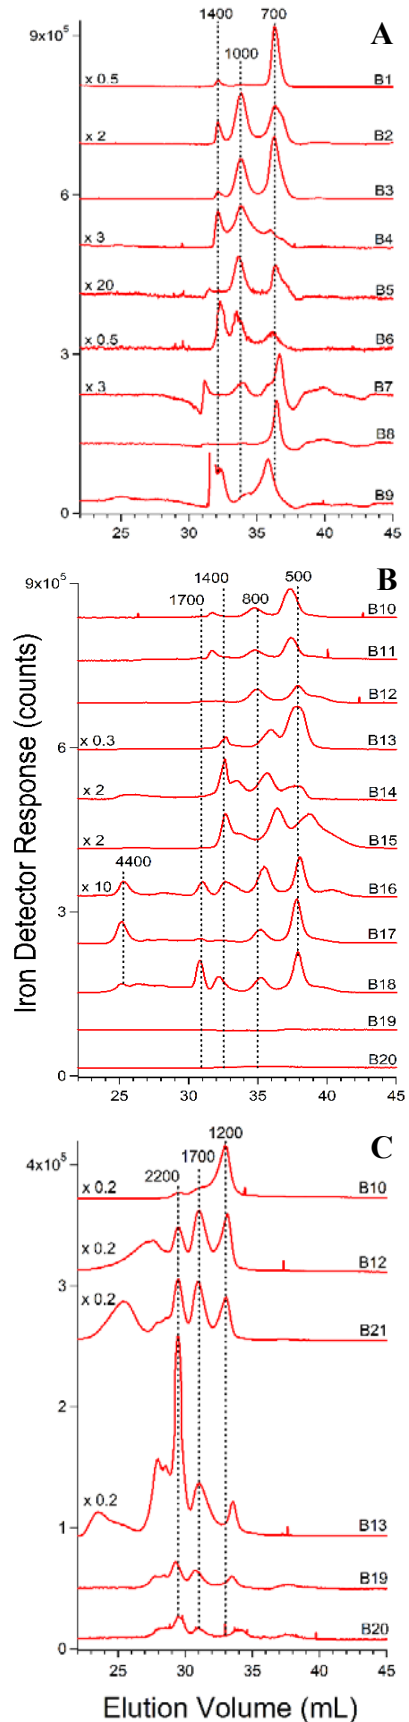

**Figure S3: Phosphorous-detected chromatograms of FTS from isolated vacuoles.** See the Figure S2 legend for other details.

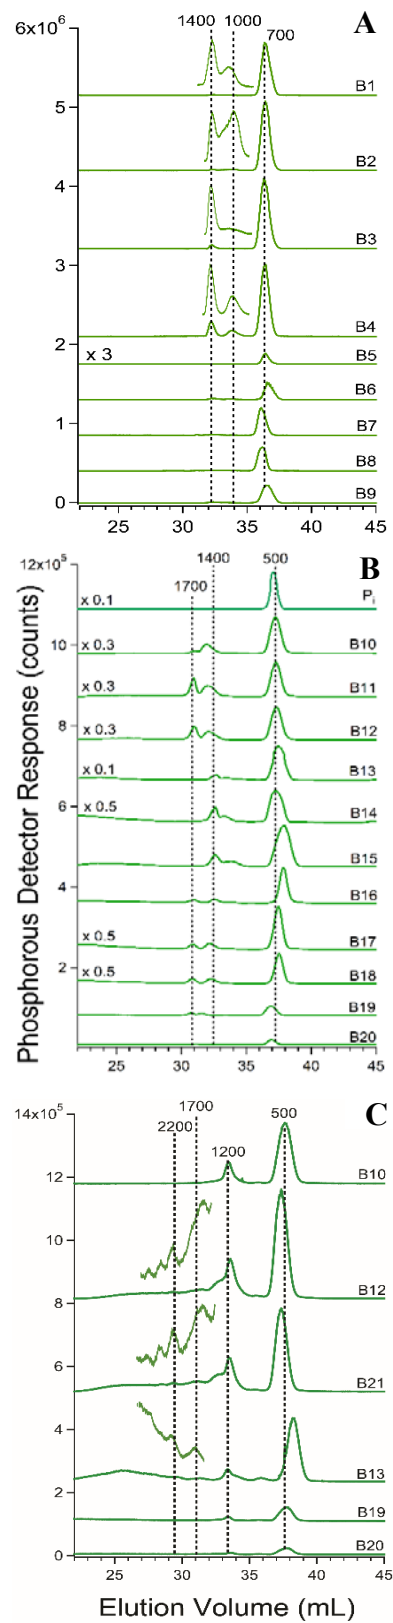

**Figure S4: Zinc-detected chromatograms of FTSs from isolated vacuoles.** See the Figure S2 legend for other details.

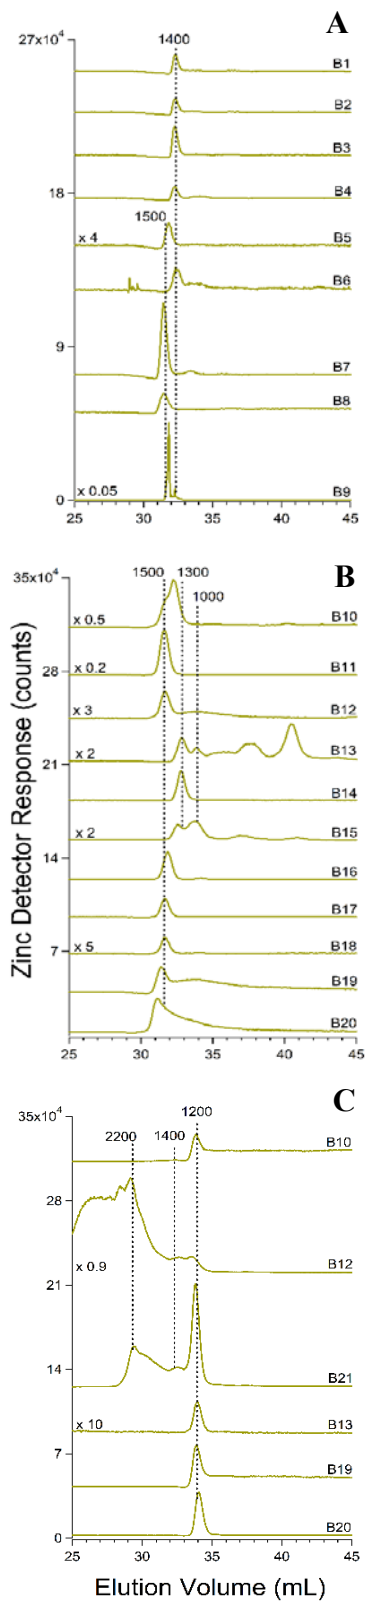

**Figure S5: Manganese-detected chromatograms of FTSs from isolated vacuoles.** See the Figure S2 legend for other details.

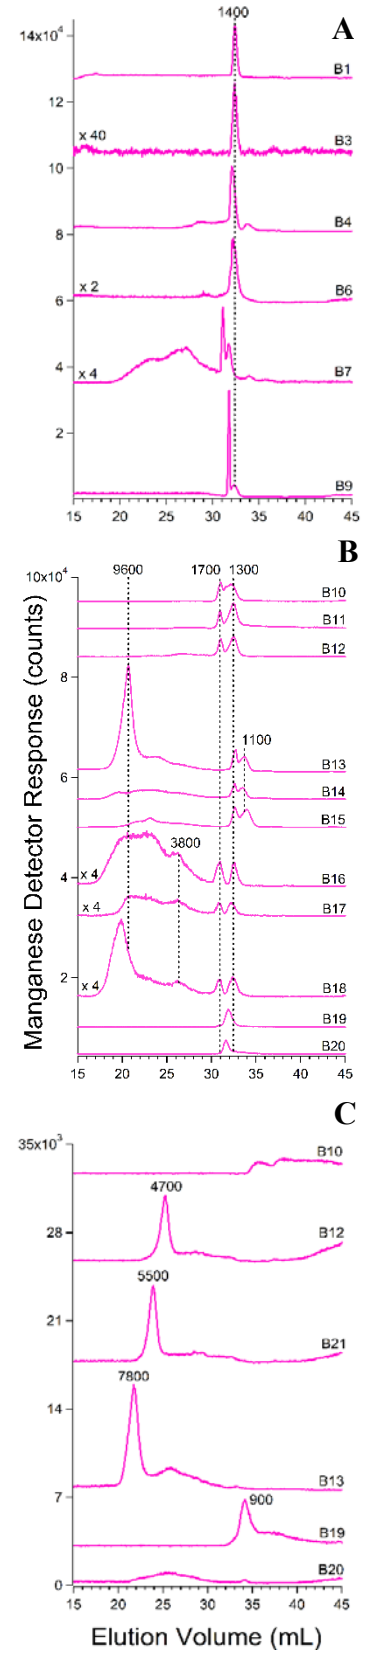

**Figure S6: Overlaying of Mn and P for Batch 13, 16, 17, and 18 at pH 8.5 mobile phase.**

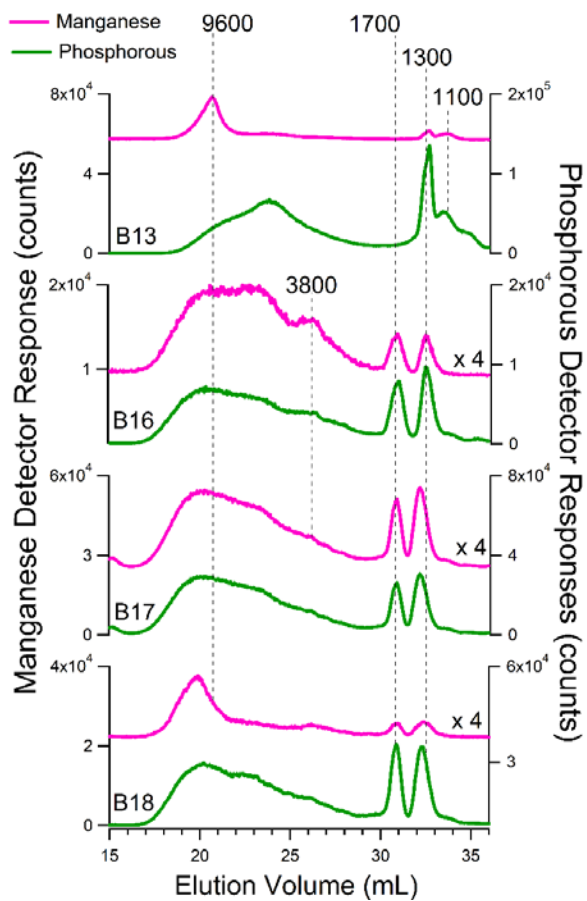



**Figure S7: Phosphorous-detected Chromatograms of FTS from isolated vacuoles from WT strain in the presence of Phosphatase Inhibitors Cocktail.** 10 mM stock of Phosphatase Inhibitors Cocktail (abcam, ab201113) containing imidazole, sodium fluoride, sodium molybdate, sodium orthovanadate, and sodium tartrate dihydrate was added to all buffers of vacuoles isolation procedure at a final concentration of 1 mM starting from the spheroplasting step and during the collection of vacuolar FTSs (n = 2).

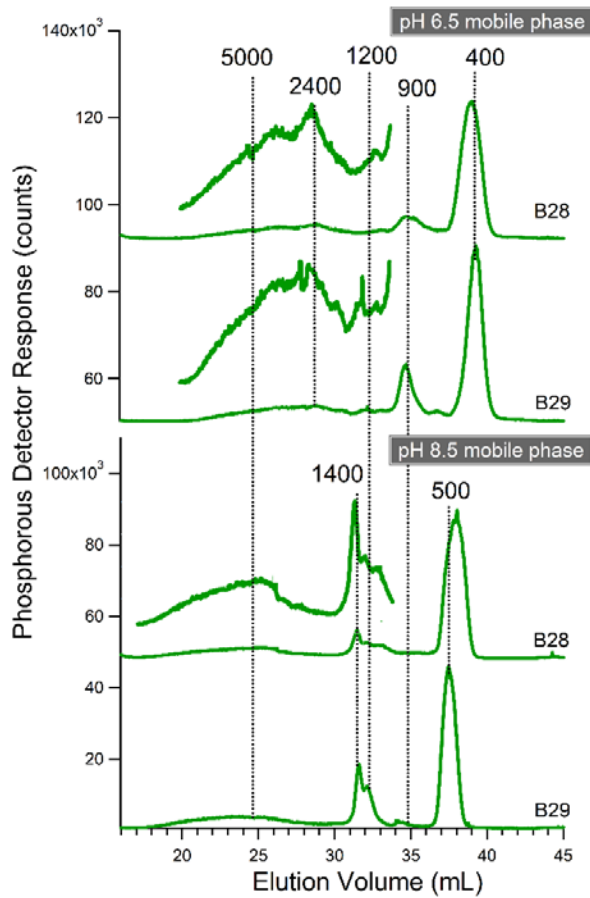

**Figure S8: Copper-detected Chromatograms of FTS from isolated vacuoles from WT strain.** See the Figure S3 legend for other details.

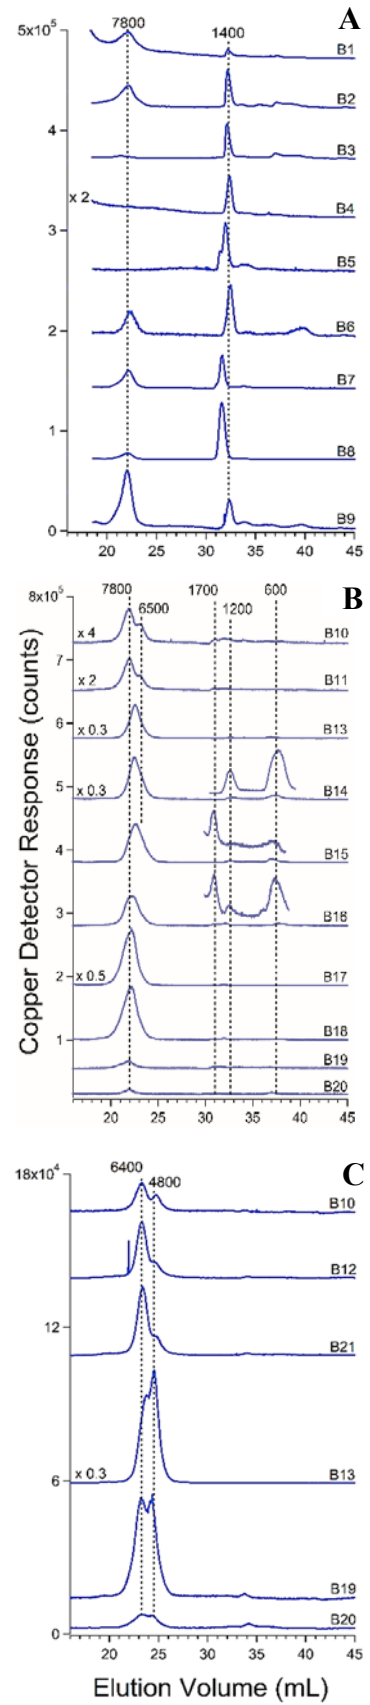

**Figure S9: Copper-detected Chromatograms of FTS from isolated vacuoles from Cox17Δ (Panel A) and Cup1Δ (Panel B) cells. See the Figure S3 legend for other details.**

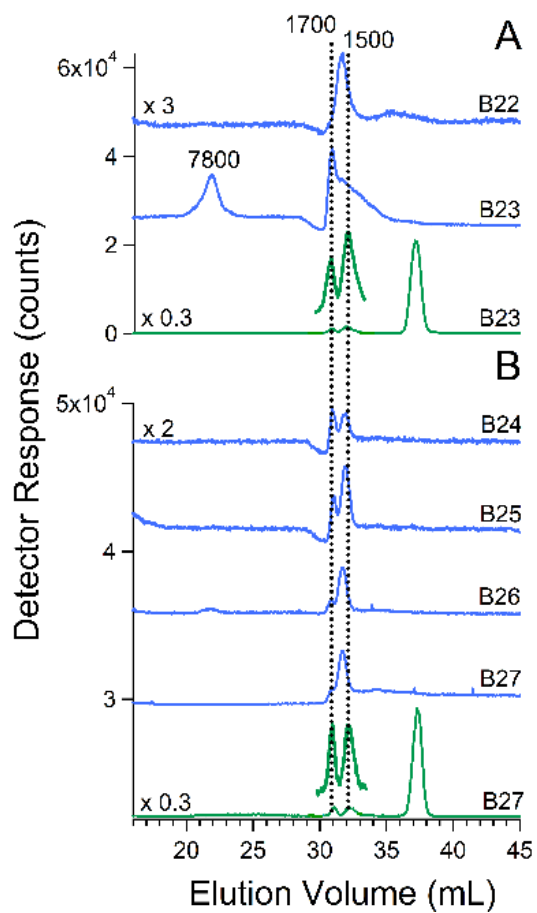

Supplement: NIHMS1576903-supplement-Nguyen_2019.pdf [file NIHMS1576903-supplement-Nguyen_2019.pdf]
